# Supplementary material for: ATP-Binding Cassette Transporters in the Clinical Implementation of Pharmacogenetics
Source: J Pers Med. 2018 Dec 5;8(4):40. doi: 10.3390/jpm8040040 (PMC6313650; doi:10.3390/jpm8040040)
Supplement: Supplementary file 1 [file jpm-08-00040-s001.xlsx]

## Sheet: Hoja1
Supplementary Table 1.- Main variants in the ABC transporter genes with the greatest potential interest in pharmacogenetics
Chrom	Position	RSID	Reference	Alternate	Consequence	Protein Consequence	Transcript Consequence	Annotation	Allele Frequency	Gen
9	107562804	rs2230808	T	C	p.Lys1587Arg	p.Lys1587Arg	c.4760A>G	missense	0.6936	ABCA1
9	107620867	rs2230806	C	T	p.Arg219Lys	p.Arg219Lys	c.656G>A	missense	0.3299	ABCA1
9	107624029	rs2230805	C	T	p.Leu158Leu	p.Leu158Leu	c.474G>A	synonymous	0.3029	ABCA1
9	107556793	rs5899617	T	TAAA	c.5383-5_5383-3dupTT...		c.5383-5_5383-3dupTTT	splice region	0.2178	ABCA1
9	107586753	rs2066714	T	C	p.Ile883Met	p.Ile883Met	c.2649A>G	missense	0.2133	ABCA1
9	107591272	rs2853579	G	T	p.Ile680Ile	p.Ile680Ile	c.2040C>A	synonymous	0.2027	ABCA1
9	107665978	rs1800978	C	G			c.-18G>C	5' UTR	0.179	ABCA1
9	107556793	rs5899617	T	TAA	c.5383-4_5383-3dupTT		c.5383-4_5383-3dupTT	splice region	0.1533	ABCA1
9	107556793	rs5899617	TA	T	c.5383-3delT		c.5383-3delT	splice region	0.1366	ABCA1
9	107602666	rs2246841	C	T	p.Gly316Gly	p.Gly316Gly	c.948G>A	synonymous	0.1229	ABCA1
9	107568705	rs2066716	C	T	p.Thr1427Thr	p.Thr1427Thr	c.4281G>A	synonymous	0.1074	ABCA1
9	107556793	rs5899617	T	TA	c.5383-3dupT		c.5383-3dupT	splice region	0.1073	ABCA1
9	107602678	rs2274873	G	A	p.Pro312Pro	p.Pro312Pro	c.936C>T	synonymous	0.08876	ABCA1
9	107588033	rs2066715	C	T	p.Val825Ile	p.Val825Ile	c.2473G>A	missense	0.08046	ABCA1
9	107556793	rs5899617	T	TAAAA	c.5383-6_5383-3dupTT...		c.5383-6_5383-3dupTTTT	splice region	0.07422	ABCA1
9	107589255	rs2066718	C	T	p.Val771Met	p.Val771Met	c.2311G>A	missense	0.05119	ABCA1
9	107579632	rs33918808	C	G	p.Glu1172Asp	p.Glu1172Asp	c.3516G>C	missense	0.0382	ABCA1
9	107550222	rs9282537	G	A	p.Gly2061Gly	p.Gly2061Gly	c.6183C>T	synonymous	0.03634	ABCA1
9	107578478	rs2230807	C	T	p.Arg1228Arg	p.Arg1228Arg	c.3684G>A	synonymous	0.01777	ABCA1
9	107578529	rs34788556	T	C	p.Glu1211Glu	p.Glu1211Glu	c.3633A>G	synonymous	0.01557	ABCA1
9	107556793	rs5899617	T	TAAAAA	c.5383-7_5383-3dupTT...		c.5383-7_5383-3dupTTTTT	splice region	0.01464	ABCA1
9	107566930	rs41277763	C	A	p.Thr1512Thr	p.Thr1512Thr	c.4536G>T	synonymous	0.01333	ABCA1
9	107581042	rs35204915	G	A	p.Leu1122Leu	p.Leu1122Leu	c.3364C>T	synonymous	0.01289	ABCA1
9	107554274	rs34078184	A	G	p.Tyr1921Tyr	p.Tyr1921Tyr	c.5763T>C	synonymous	0.01163	ABCA1
7	87229501	rs2214102	T	C			c.-1A>G	5' UTR	0.9445	ABCB1
7	87160618	rs2032582	A	C	p.Ser893Ala	p.Ser893Ala	c.2677T>G	missense	0.5432	ABCB1
7	87179601	rs1128503	A	G	p.Gly412Gly	p.Gly412Gly	c.1236T>C	synonymous	0.5419	ABCB1
7	87138645	rs1045642	A	G	p.Ile1145Ile	p.Ile1145Ile	c.3435T>C	synonymous	0.5034	ABCB1
7	87229440	rs9282564	T	C	p.Asn21Asp	p.Asn21Asp	c.61A>G	missense	0.08002	ABCB1
7	87179443	rs2032588	G	A			n.32C>T	non coding transcript exon	0.05782	ABCB1
7	87160618	rs2032582	A	T	p.Ser893Thr	p.Ser893Thr	c.2677T>A	missense	0.03713	ABCB1
7	87179809	rs2229109	C	T	p.Ser400Asn	p.Ser400Asn	c.1199G>A	missense	0.02902	ABCB1
7	20778646	rs6461515	G	A	p.Glu970Lys	p.Glu970Lys	c.2908G>A	missense	0.8033	ABCB5
7	20768013	rs10254317	G	A	p.Ala934Ala	p.Ala934Ala	c.2802G>A	synonymous	0.4891	ABCB5
7	20698270	rs2301641	A	G	p.Lys560Glu	p.Lys560Glu	c.1678A>G	missense	0.3368	ABCB5
7	20687181	rs2893006	C	T	p.Ser335Ser	p.Ser335Ser	c.1005C>T	synonymous	0.3139	ABCB5
7	20685508	rs11983326	T	G	c.803+5T>G		c.803+5T>G	splice region	0.3132	ABCB5
7	20762646	rs62453384	G	T	p.Gly810Val	p.Gly810Val	c.2429G>T	missense	0.3049	ABCB5
7	20691047	rs34603556	T	C	p.Met1?‚Ä†	p.Met1?	c.2T>C	start lost	0.1809	ABCB5
7	20687604	rs61732039	A	G	p.Asp370Gly	p.Asp370Gly	c.1109A>G	missense	0.1118	ABCB5
7	20666235	rs17143187	G	C	c.108+1G>C		c.108+1G>C	splice donor	0.1114	ABCB5
7	20691219	rs61227829	G	A	p.Ala503Ala	p.Ala503Ala	c.1509G>A	synonymous	0.1042	ABCB5
7	20683204	rs7349983	G	T	p.Val209Val	p.Val209Val	c.627G>T	synonymous	0.1034	ABCB5
7	20685484	rs2074000	C	A	p.Gln262Lys	p.Gln262Lys	c.784C>A	missense	0.08312	ABCB5
7	20682884	rs17143212	C	T	p.Thr131Ile	p.Thr131Ile	c.392C>T	missense	0.04358	ABCB5
7	20768077	rs117497357	A	T	p.Ile956Leu	p.Ile956Leu	c.2866A>T	missense	0.03255	ABCB5
7	20767954	rs17143304	G	A	p.Ala915Thr	p.Ala915Thr	c.2743G>A	missense	0.03071	ABCB5
7	20739465	rs11772720	T	C	p.Asp724Asp	p.Asp724Asp	c.2172T>C	synonymous	0.0127	ABCB5
7	20793113	rs58795451	A	G	p.Asp1187Gly	p.Asp1187Gly	c.3560A>G	missense	0.01066	ABCB5
7	20683170	rs150545949	T	C	p.Val198Ala	p.Val198Ala	c.593T>C	missense	0.01011	ABCB5
16	16162019	rs35605	T	C	p.Leu562Leu	p.Leu562Leu	c.1684T>C	synonymous	0.7932	ABCC1
16	16199255	rs16967755	A	G	c.36-2A>G‚Ä†		c.36-2A>G	splice acceptor	0.5263	ABCC1
16	16138322	rs246221	T	C	p.Val275Val	p.Val275Val	c.825T>C	synonymous	0.337	ABCC1
16	16139878	rs35588	A	G	c.1218+8A>G		c.1218+8A>G	splice region	0.3367	ABCC1
16	16139714	rs35587	T	C	p.Asn354Asn	p.Asn354Asn	c.1062T>C	synonymous	0.3364	ABCC1
16	16228242	rs2230671	G	A	p.Ser1334Ser	p.Ser1334Ser	c.4002G>A	synonymous	0.2435	ABCC1
16	16150208	rs17265551	C	T			n.1333C>T	non coding transcript exon	0.09528	ABCC1
16	16162039	rs8187858	C	T	p.Tyr568Tyr	p.Tyr568Tyr	c.1704C>T	synonymous	0.06652	ABCC1
16	16138313	rs45560437	G	A	p.Pro272Pro	p.Pro272Pro	c.816G>A	synonymous	0.04385	ABCC1
16	16173232	rs45511401	G	T	p.Gly671Val	p.Gly671Val	c.2012G>T	missense	0.0393	ABCC1
16	16177275	rs4148356	G	A	p.Arg723Gln	p.Arg723Gln	c.2168G>A	missense	0.0211	ABCC1
16	16173221	rs8187863	C	T	p.Ser667Ser	p.Ser667Ser	c.2001C>T	synonymous	0.01375	ABCC1
6	43399837	rs700008	A	G			c.-11A>G	5' UTR	0.881	ABCC10
6	43401105	rs9394952	G	A	c.1380+7G>A		c.1380+7G>A	splice region	0.4764	ABCC10
6	43412865	rs2125739	T	C	p.Ile948Thr	p.Ile948Thr	c.2843T>C	missense	0.2243	ABCC10
6	43406501	rs2277122	C	T	p.Leu699Leu	p.Leu699Leu	c.2095C>T	synonymous	0.06376	ABCC10
6	43411659	rs79175380	T	C			n.2133T>C	non coding transcript exon	0.06209	ABCC10
6	43400342	rs45535935	T	G	p.Asp208Glu	p.Asp208Glu	c.624T>G	missense	0.02118	ABCC10
6	43417852	rs7752305	G	C			c.*23G>C	3' UTR	0.01892	ABCC10
6	43412935	rs2125740	T	C	p.Tyr971Tyr	p.Tyr971Tyr	c.2913T>C	synonymous	0.01762	ABCC10
6	43405665	rs831311	C	T	c.1876-7C>T		c.1876-7C>T	splice region	0.01393	ABCC10
16	48258198	rs17822931	C	T	p.Gly180Arg	p.Gly180Arg	c.538G>A	missense	0.2251	ABCC11
16	48226479	rs12443685	C	T	p.Lys886Lys	p.Lys886Lys	c.2658G>A	synonymous	0.1708	ABCC11
16	48201432	rs16945916	T	C	p.His1344Arg	p.His1344Arg	c.4031A>G	missense	0.158	ABCC11
16	48248918	rs8047091	T	C	p.Lys374Lys	p.Lys374Lys	c.1122A>G	synonymous	0.1529	ABCC11
16	48227862	rs11866251	G	A	p.Phe812Phe	p.Phe812Phe	c.2436C>T	synonymous	0.1477	ABCC11
16	48256602	rs16945974	T	C	p.Gln228Gln	p.Gln228Gln	c.684A>G	synonymous	0.1002	ABCC11
16	48250026	rs11863236	G	T	p.Ala317Glu	p.Ala317Glu	c.950C>A	missense	0.09894	ABCC11
16	48265777	rs16945988	C	T	p.Arg19His	p.Arg19His	c.56G>A	missense	0.09338	ABCC11
16	48204078	rs61739606	T	A	p.Asn1277Tyr	p.Asn1277Tyr	c.3829A>T	missense	0.07594	ABCC11
16	48242379	rs17822471	G	A	p.Thr546Met	p.Thr546Met	c.1637C>T	missense	0.04989	ABCC11
16	48234327	rs16945930	C	T	p.Val648Ile	p.Val648Ile	c.1942G>A	missense	0.04378	ABCC11
16	48250031	rs11860868	T	C	p.Pro315Pro	p.Pro315Pro	c.945A>G	synonymous	0.01736	ABCC11
16	48278291	rs150981618	G	T			n.209C>A	non coding transcript exon	0.01255	ABCC11
16	48204130	rs60681475	C	T	c.3778-1G>A		c.3778-1G>A	splice acceptor	0.01031	ABCC11
10	101544447	rs927344	A	T	p.Tyr39Phe	p.Tyr39Phe	c.116A>T	missense	0.998	ABCC2
10	101604207	rs3740066	C	T	p.Ile1324Ile	p.Ile1324Ile	c.3972C>T	synonymous	0.342	ABCC2
10	101563815	rs2273697	G	A	p.Val417Ile	p.Val417Ile	c.1249G>A	missense	0.1953	ABCC2
10	101542578	rs717620	C	T			c.-24C>T	5' UTR	0.1687	ABCC2
10	101611294	rs8187710	G	A	p.Cys1515Tyr	p.Cys1515Tyr	c.4544G>A	missense	0.05238	ABCC2
10	101606861	rs1137968	G	T	p.Val1430Val	p.Val1430Val	c.4290G>T	synonymous	0.04341	ABCC2
10	101595996	rs17222723	T	A	p.Val1188Glu	p.Val1188Glu	c.3563T>A	missense	0.04301	ABCC2
10	101610533	rs8187707	C	T	p.His1496His	p.His1496His	c.4488C>T	synonymous	0.04094	ABCC2
10	101578952	rs17222617	T	G	p.Leu849Arg	p.Leu849Arg	c.2546T>G	missense	0.01402	ABCC2
10	101610455	rs8187706	G	A	p.Glu1470Glu	p.Glu1470Glu	c.4410G>A	synonymous	0.01025	ABCC2
10	101564012	rs113646094	C	G	p.Thr482Thr	p.Thr482Thr	c.1446C>G	synonymous	0.01001	ABCC2
17	48712711	rs9890046	C	G	p.Leu61Val‚Ä†	p.Leu61Val	c.181C>G	missense	0.8513	ABCC3
17	48712705	rs12604031	G	A	p.Gly59Arg‚Ä†	p.Gly59Arg	c.175G>A	missense	0.7832	ABCC3
17	48761105	rs2277624	C	T	p.His1314His	p.His1314His	c.3942C>T	synonymous	0.2478	ABCC3
17	48768486	.	A	G	p.Glu1503Glu	p.Glu1503Glu	c.4509A>G	synonymous	0.1461	ABCC3
17	48753423	rs4148416	C	T	p.Gly1013Gly	p.Gly1013Gly	c.3039C>T	synonymous	0.08646	ABCC3
17	48755388	rs967935	C	T	p.Ser1221Phe‚Ä†	p.Ser1221Phe	c.3662C>T	missense	0.08207	ABCC3
17	48761053	rs11568591	G	A	p.Arg1297His	p.Arg1297His	c.3890G>A	missense	0.03644	ABCC3
17	48712336	.	G	C	p.Lys13Asn	p.Lys13Asn	c.39G>C	missense	0.03609	ABCC3
17	48712263	rs112259322	C	A			c.-35C>A	5' UTR	0.02339	ABCC3
17	48753035	rs35999272	C	T	p.Pro920Ser	p.Pro920Ser	c.2758C>T	missense	0.02154	ABCC3
17	48745035	rs11568601	A	C	p.Arg518Arg	p.Arg518Arg	c.1552A>C	synonymous	0.01984	ABCC3
13	95673939	rs9524765	A	G	c.3871-3T>C		c.3871-3T>C	splice region	0.949	ABCC4
13	95726541	rs1189466	A	G	p.Phe948Phe	p.Phe948Phe	c.2844T>C	synonymous	0.9335	ABCC4
13	95727780	rs1678339	T	C	p.Leu904Leu	p.Leu904Leu	c.2712A>G	synonymous	0.9283	ABCC4
13	95861804	rs899494	A	G	p.Ile223Ile	p.Ile223Ile	c.669T>C	synonymous	0.8289	ABCC4
13	95714976	rs57270423	C	T	p.Lys1116Lys	p.Lys1116Lys	c.3348G>A	synonymous	0.8121	ABCC4
13	95858978	rs2274405	T	C	p.Ser323Ser	p.Ser323Ser	c.969A>G	synonymous	0.6362	ABCC4
13	95858996	rs2274406	T	C	p.Arg317Arg	p.Arg317Arg	c.951A>G	synonymous	0.6043	ABCC4
13	95673791	rs3742106	A	C			c.*38T>G	3' UTR	0.4062	ABCC4
13	95899354	rs4148437	A	G	c.186-5T>C		c.186-5T>C	splice region	0.3047	ABCC4
13	95859035	rs2274407	C	A	p.Lys304Asn	p.Lys304Asn	c.912G>T	missense	0.1006	ABCC4
13	95863008	rs11568658	C	A	p.Gly187Trp	p.Gly187Trp	c.559G>T	missense	0.04502	ABCC4
13	95953617	rs3751333	G	A			c.-49C>T	5' UTR	0.0354	ABCC4
13	95673941	.	A	G	c.3871-5T>C		c.3871-5T>C	splice region	0.02948	ABCC4
13	95921679	.	CA	C	c.*-4delT‚Ä†		c.*-4delT	splice region	0.02778	ABCC4
13	95815415	rs3765534	C	T	p.Glu757Lys	p.Glu757Lys	c.2269G>A	missense	0.02368	ABCC4
13	95839003	rs1557070	G	A	p.Tyr499Tyr	p.Tyr499Tyr	c.1497C>T	synonymous	0.02332	ABCC4
13	95953517	rs11568681	G	T	p.Leu18Ile	p.Leu18Ile	c.52C>A	missense	0.02097	ABCC4
13	95696540	rs11568695	C	T	p.Ala1203Ala	p.Ala1203Ala	c.3609G>A	synonymous	0.01507	ABCC4
13	95921679	.	C	CA	c.*-4dupT‚Ä†		c.*-4dupT	splice region	0.01389	ABCC4
13	95858778	rs11568702	A	T	c.1161+8T>A		c.1161+8T>A	splice region	0.0125	ABCC4
13	95673940	.	G	GA	c.3871-5dupT		c.3871-5dupT	splice region	0.01103	ABCC4
3	183685534	rs939336	A	G	p.Cys594Cys	p.Cys594Cys	c.1782T>C	synonymous	0.587	ABCC5
3	183696402	rs1132776	A	G	p.Ala395Ala	p.Ala395Ala	c.1185T>C	synonymous	0.5821	ABCC5
3	183699516	rs7636910	T	C	c.1146A>G	p.Gln382Gln	c.1146A>G	splice region	0.3491	ABCC5
3	183660585	rs3749442	G	A	p.Leu1208Leu	p.Leu1208Leu	c.3624C>T	synonymous	0.201	ABCC5
3	183696387	rs1053386	G	A	p.Ser400Ser	p.Ser400Ser	c.1200C>T	synonymous	0.02425	ABCC5
16	16272670	rs7500834	T	C	p.Gly800Gly	p.Gly800Gly	c.2400A>G	synonymous	0.9905	ABCC6
16	16271357	rs111973031	T	C	p.Met848Val	p.Met848Val	c.2542A>G	missense	0.9902	ABCC6
16	16291871	rs9940089	G	C	c.1338+7C>G		c.1338+7C>G	splice region	0.7977	ABCC6
16	16281007	rs12931472	A	G	p.Val614Ala	p.Val614Ala	c.1841T>C	missense	0.4261	ABCC6
16	16278863	rs8058694	G	T	p.His632Gln	p.His632Gln	c.1896C>A	missense	0.4152	ABCC6
16	16278869	rs8058696	G	C	p.Thr630Thr	p.Thr630Thr	c.1890C>G	synonymous	0.4152	ABCC6
16	16291983	rs9930886	A	G	p.Asn411Asn	p.Asn411Asn	c.1233T>C	synonymous	0.3384	ABCC6
16	16291971	rs9940825	C	T	p.Val415Val	p.Val415Val	c.1245G>A	synonymous	0.3067	ABCC6
16	16251599	rs2238472	C	T	p.Arg1268Gln	p.Arg1268Gln	c.3803G>A	missense	0.2446	ABCC6
16	16271409	rs9924755	G	A	p.Ala830Ala	p.Ala830Ala	c.2490C>T	synonymous	0.1395	ABCC6
16	16263663	rs2856585	G	A	p.Pro945Pro	p.Pro945Pro	c.2835C>T	synonymous	0.1146	ABCC6
16	16243973	rs3902401	C	T			c.*17G>A	3' UTR	0.07013	ABCC6
16	16313545	.	C	T	c.346-6G>A		c.346-6G>A	splice region	0.05682	ABCC6
16	16315407	.	C	T			c.*18G>A	3' UTR	0.0442	ABCC6
16	16263662	rs61340537	G	T	p.Leu946Ile	p.Leu946Ile	c.2836C>A	missense	0.02204	ABCC6
16	16259596	rs41278174	G	A	p.Arg1064Trp	p.Arg1064Trp	c.3190C>T	missense	0.02058	ABCC6
16	16276292	rs59593133	T	C	p.Ile742Val	p.Ile742Val	c.2224A>G	missense	0.01803	ABCC6
16	16276341	rs59757815	T	A	p.Val725Val	p.Val725Val	c.2175A>T	synonymous	0.01803	ABCC6
16	16255424	rs41278172	G	A	c.3507-3C>T		c.3507-3C>T	splice region	0.01605	ABCC6
16	16276345	rs58073789	C	T	p.Arg724Lys	p.Arg724Lys	c.2171G>A	missense	0.01501	ABCC6
21	43639332	.	CCCGCCG	C			c.-14_-9delGCCGCC	5' UTR	0.2906	ABCG1
21	43640066	rs9975490	C	G			c.-16C>G	5' UTR	0.1708	ABCG1
21	43679438	rs915841	T	C	p.His94His‚Ä†	p.His94His	c.282T>C	synonymous	0.1619	ABCG1
21	43679554	rs915843	C	T	p.Pro133Leu‚Ä†	p.Pro133Leu	c.398C>T	missense	0.1505	ABCG1
21	43679513	rs915842	C	T	p.Ile119Ile‚Ä†	p.Ile119Ile	c.357C>T	synonymous	0.15	ABCG1
21	43676586	rs7281684	A	T	p.Tyr43Phe‚Ä†	p.Tyr43Phe	c.128A>T	missense	0.1309	ABCG1
21	43639332	.	CCCG	C			c.-11_-9delGCC	5' UTR	0.06793	ABCG1
21	43696999	rs56145149	C	T	c.538-6C>T		c.538-6C>T	splice region	0.06566	ABCG1
21	43676387	rs56362761	G	A	p.Ala16Thr‚Ä†	p.Ala16Thr	c.46G>A	missense	0.04669	ABCG1
21	43680106	.	CGGCATCCTGCACGTG	C	p.Ala157_Trp161del‚Ä†	p.Ala157_Trp161del	c.469_483delGCATCCTGCACGTGG	inframe deletion	0.04235	ABCG1
21	43716554	rs56337741	G	A			c.*52G>A	3' UTR	0.03881	ABCG1
21	43708018	rs56140811	C	T	p.Gly331Gly	p.Gly331Gly	c.993C>T	synonymous	0.02289	ABCG1
21	43639332	.	C	CCCGCCG			c.-14_-9dupGCCGCC	5' UTR	0.01517	ABCG1
21	43691232	rs117953608	G	A	p.Leu113Leu	p.Leu113Leu	c.339G>A	synonymous	0.01011	ABCG1
4	89052323	rs2231142	G	T	p.Gln141Lys	p.Gln141Lys	c.421C>A	missense	0.118	ABCG2
4	89061114	rs2231137	C	T	p.Val12Met	p.Val12Met	c.34G>A	missense	0.1076	ABCG2
4	89080351	rs2231134	C	G	c.35+6G>C‚Ä†		c.35+6G>C	splice region	0.0205	ABCG2
4	89034551	rs35622453	C	T	p.Glu366Glu	p.Glu366Glu	c.1098G>A	synonymous	0.01505	ABCG2
7	117199533	rs213950	G	A	p.Val470Met	p.Val470Met	c.1408G>A	missense	0.4829	CFTR
7	117307108	rs1800136	G	A	p.Gln1463Gln	p.Gln1463Gln	c.4389G>A	synonymous	0.2253	CFTR
7	117120141	rs1800501	G	C			c.-8G>C	5' UTR	0.04549	CFTR
7	117149147	rs1800076	G	A	p.Arg75Gln	p.Arg75Gln	c.224G>A	missense	0.01536	CFTR
7	117235055	rs1042077	T	G	p.Thr854Thr	p.Thr854Thr	c.2562T>G	synonymous	0.3889	CTFR
7	117282644	rs1800130	A	G	p.Pro1290Pro	p.Pro1290Pro	c.3870A>G	synonymous	0.05203	CTFR
7	117199709	rs1800095	G	A	c.1584G>A	p.Glu528Glu	c.1584G>A	splice region	0.01691	CTFR
